# Supplementary material for: Salinity and temperature significantly influence seed germination, seedling establishment, and seedling growth of eelgrass Zostera marina L
Source: PeerJ. 2016 Nov 15;4:e2697. doi: 10.7717/peerj.2697 (PMC5119234; doi:10.7717/peerj.2697)
Supplement: Supplemental Information 1 [file peerj-04-2697-s001.xlsx]

## Sheet: Moisture content of seeds
	Wet seed mass and dry weight of Zostera marina seeds
	(30 seeds/colour; 3 replicates/colour;10 seeds/replicate)
	Seed colour		Wet seed mass (mg/10 seeds)	Dry weight (mg/10 seeds)
	Oyster white	No. 1	63	26
		No. 2	67.4	28
		No. 3	63.7	26.7
	Cyan	No. 1	79.3	47.4
		No. 2	78.2	47.5
		No. 3	76.9	45.7
	Black	No. 1	125	79.2
		No. 2	124.6	77.9
		No. 3	125.4	77.6

## Sheet: Germination rates (%) of ...
	Number of germinated eelgrass seeds subjected to the different salinities and temperatures after 4 weeks
	(150 seeds/treatment; 3 replicates/treatment; 50 seeds/replicate)
	Salinity (ppt)	Temperature (°C)
		5			10			15			20
		No. 1	No. 2	No. 3	No. 1	No. 2	No. 3	No. 1	No. 2	No. 3	No. 1	No. 2	No. 3
	0	42	38	44	38	41	42	46	46	41	46	39	44
	5	36	27	25	30	25	29	31	36	36	37	36	33
	10	18	8	8	26	19	18	27	33	32	36	32	26
	15	12	6	13	13	16	8	26	24	19	17	10	17
	20	1	1	1	9	4	6	17	14	18	23	18	12
	25	3	2	0	11	7	8	12	13	7	14	17	10
	30	0	0	1	3	3	1	4	4	6	8	6	9
	35	0	1	0	0	1	0	4	4	6	3	4	6
	40	2	2	1	2	0	1	2	3	4	4	6	7

## Sheet: Ecological morphology of...
	Changes in ecological morphology of Zostera marina L. seeds and seedlings at different salinities at 5°C, including germination rates, seedling length, number of leaves, leaf length, seedling wet weight, and other morphological parameters.
	(300 seeds/treatment; 3 replicates/treatment and 100 seeds/replicate for seed germination)
				Salinity (ppt)
				0			10			20			30
				No. 1	No. 2	No. 3	No. 1	No. 2	No. 3	No. 1	No. 2	No. 3	No. 1	No. 2	No. 3
	1st week	Number of germinated seeds	Day 1	First appearance of germination						no germination
			Day2	2	3	2	1	0	1	First appearance of germination			no germination
			Day4	11	12	12	3	1	2	1	1	0	First appearance of germination
		Other morphological changes		Whole embryo breaks through the seed coat all at once						Cotyledon breaks through the stoma and then the embryo breaks through the seed coat
	3rd week	Number of germinated seeds		89	70	86	80	69	69	19	30	28	6	9	14
		Seedling length (cm)		See the following table in this page!
		Number of leaves/seedling		No leaf						First true leaf was observed; the leaf is shorter than the cotyledonary blade
		Other morphological changes		Top of cotyledonary blade becomes brown			Cotyledonary blade becomes longer			Occurrence of adventitious root differentiation
	6th week	Number of germinated seeds		89	80	88	83	70	71	27	34	36	7	11	16
		Seedling length (cm)		See the following table in this page!
		All seedling wet weight/replicate (mg)		703.1	688	783.2	805.1	931	603.5	499.5	741.2	655.2	198.8	237.6	424
		Number of leaves/seedling		No leaf						Second true leaf was observed; the cotyledonary blade is shorter than the leaves
		Leaf length		0 ( No leaf )						See the following table in this page!
		Other morphological changes		The brown part decays continuely			Occurrence of leaf differentiation			The cotyledonary blade wizens; the leaves elongates
			Seedling length after 3 weeks (cm)
				Salinity 0			Salinity 10			Salinity 20			Salinity 30
				No. 1	No. 2	No. 3	No. 1	No. 2	No. 3	No. 1	No. 2	No. 3	No. 1	No. 2	No. 3
			1	0.66	0.53	0.92	0.81	1.78	1.83	2.9	2.13	2.32	3.41	3.55	3.4
			2	0.71	0.7	0.31	0.5	0.86	1.72	2.44	2.41	2.4	3.31	3.28	3.67
			3	0.48	0.26	0.47	0.67	1.27	1.33	2.36	2.56	3.28	3.21	3.6	3.03
			4	0.36	0.67	0.1	1.28	1.42	1.45	2.49	3.05	3.35	3.18	3.4	2.93
			5	0.8	0.32	0.84	0.52	0.97	1.01	1.98	2.58	2.04	3.09	3.94	3.33
			6	0.36	0.6	0.14	1.4	0.98	1.04	2.53	2.49	2.47	3.13	3.61	3.33
			7	0.91	0.47	0.61	0.98	1.82	1.31	2.88	2.89	2.73		3.27	2.73
			8	0.3	0.46	0.85	1.2	1.12	0.93	2.73	2.58	2.43		3.05	3.11
			9	0.78	0.58	0.54	1.48	1.21	1.39	2.26	3.18	2.53		3.34	3.01
			10	0.92	0.54	0.52	1.24	1.3	0.99	1.52	3.03	2.67			3.77
			11	0.37	0.3	0.53	1.24	1.29	1.88	2.95	2.33	2.4			2.96
			12	0.53	0.32	0.55	1.29	1.03	1.43	2.41	2.72	2.6			3.59
			13	0.84	0.52	0.15	0.86	0.98	1.05	2.44	2.87	2.08			3.56
			14	0.73	0.3	0.66	1.17	0.93	0.66	2.45	2.22	2.61			3.4
			15	0.64	0.42	0.8	1.58	0.81	1.84	3.12	2.4	2.65
			16	0.54	0.69	1.08	1.89	1.46	1.24	2.52	2.16	1.98
			17	0.61	0.71	0.77	1.29	1.15	1.23	2.48	2.73	3.23
			18	0.3	0.41	0.77	1.64	1.87	1.25	2.29	2.78	2.46
			19	0.59	0.54	0.66	1.04	1.33	1.32	2.17	2.53	2.92
			20	0.32	0.2	0.76	1.08	1.28	1.11		2.51	2.62
			21	0.25	0.77	0.3	1.41	1.33	0.66		2.93	2.34
			22	1.06	0.66	0.59	1.69	0.66	2.05		2.26	2.55
			23	0.55	0.36	0.93	1.17	0.72	1.65		2.36	2.11
			24	0.63	0.64	0.69	1.4	1.44	1.13		3.11	2.54
			25	0.41	0.6	0.33	0.89	1.37	1.13		2.65	2.32
			26	0.49	0.89	0.54	1.22	0.96	1.21		2.05	2.82
			27	0.6	0.48	0.65	0.96	1.08	0.98		2.23	2.45
			28	0.73	0.27	0.45	1.27	0.83	1.32		2.82	2.66
			29	0.61	0.53	0.51	1.32	1.18	1.56		1.9
			30	0.24	0.74	0.7	1.33	0.72	1.32		2.42
			Seedling length after 6 weeks (cm)
				Salinity 0			Salinity 10			Salinity 20			Salinity 30
				No. 1	No. 2	No. 3	No. 1	No. 2	No. 3	No. 1	No. 2	No. 3	No. 1	No. 2	No. 3
			1	2.14	2.19	1.5	2.38	4.98	3.29	5.67	5.2	6.12	5.69	5.67	7.08
			2	2.02	1.44	2.07	3.96	4.83	3.12	5.06	4.41	5.68	5.8	3.82	4.67
			3	1.36	1.36	1.36	3.35	2.65	6.52	4.23	4.29	5.14	6.77	4.64	6.05
			4	1.83	2.39	1.41	5.96	3.14	2.79	5.05	4.82	5.75	5.86	6.61	5.64
			5	1.79	1.92	1.36	4.98	3.31	5.72	4.21	4.31	4.73	7.79	6.45	7.03
			6	2.03	2.15	2.11	3.38	3.32	4.11	4.93	4.08	4.56	4.62	6.32	3.76
			7	1.4	1.08	1.84	3.6	4.45	3.01	3.5	4.77	4.4	5.06	4.71	4.6
			8	2.12	1.72	2.48	2.45	2.12	2.48	4.56	4.06	4.63		7.21	6.23
			9	2.23	2.15	1.88	3.72	2.98	2.55	4.93	5.57	5.33		5.62	5.31
			10	1.54	2.84	1.87	3.76	6.21	2.8	5.1	4.44	4.94		5.53	6.17
			11	2.04	2.14	1.62	3.31	4.58	3.7	4.89	4.98	4.78		6.29	4.75
			12	0.93	1.81	1.6	3.21	6.03	2.81	4.49	4.87	5.19			5.19
			13	0.86	2.19	2.22	2.78	3.65	2.55	4.49	5.5	5.01			4.51
			14	0.95	1.64	0.84	3.29	5.36	3.08	5.49	4.41	5.07			5.5
			15	2.11	2.12	1.57	3.7	2.05	4.54	4.56	4.81	3.25			5.59
			16	1.38	1.42	1.44	2.8	5.18	4.82	5.71	5.98	3.52			5.24
			17	1.17	1.62	2.2	3.17	3.35	4.97	4.46	4.37	4.58
			18	1.5	0.76	1.96	3.51	4.13	2.91	4.99	5.12	4.6
			19	2.5	1.25	2.79	4.71	2.14	2.79	4.82	4.89	3.76
			20	1.71	0.88	2.23	5.66	2.27	2.23	4.73	4.66	4.6
			21	1.6	1.88	1.92	3.11	4.68	6.48	5.41	5.39	5.54
			22	1.87	1.3	1.58	3.13	4.3	3.74	3.8	5.47	4.98
			23	0.9	2.16	0.74	3.76	4.94	4.79	4.83	5.23	4.53
			24	1.94	1.9	1.6	2.07	4.63	3.93	4.79	5.34	5.29
			25	1.6	1.58	1.95	3.92	4.08	3.95	5.31	4.29	5.52
			26	1.66	2.27	1.62	5.21	4.38	3.3	5.09	4.03	5.35
			27	2.25	1.47	1.79	3.87	4.36	4.41	5.29	4.83	4.84
			28	1.98	0.83	2.02	3.41	3.2	2.02		5.05	4.67
			29	2.04	0.67	0.85	3.62	6.02	2.95		4.32	4.07
			30	1.77	2.1	2.13	3.73	4.02	4.95		4.03	5.36
			Seedling leaf length after 6 weeks (cm)
				Salinity 0			Salinity 10			Salinity 20			Salinity 30
				No. 1	No. 2	No. 3	No. 1	No. 2	No. 3	No. 1	No. 2	No. 3	No. 1	No. 2	No. 3
			1							2.23	2.3	2.57	4.68	4.53	4.51
			2							2.2	2.31	2.32	4.44	4.96	3.96
			3							2.43	2.37	2.19	4.46	5.05	3.91
			4							2.24	2.17	2.49	4.77	4.5	4.29
			5							2.35	2.28	2.42	4.35	4.57	4.57
			6							2.17	2.65	2.4		4.37	4.78
			7							2.45	2.56	2.29		4.2	4.09
			8							2.31	2.38	2.29		4.93	4.47
			9							2.1	2.39	2.23		4.3	4.91
			10							2.34	2.34	2.42		3.61	4.59
			11							2.36	2.35	2.26			4.39
			12							2.25	2.15	2.47			4.89
			13							2.12	2.32	2.21
			14							2.4	2.56	2.43
			15							2.42	2.35	2.39

## Sheet: Seedling establishment rate
	Seedling establishment number for seeds germinated at reduced salinities and transferred to natural seawater (32 ppt)
	(150 seeds/treatment;3 replicates/treatment; 50 seeds/replicate)
		Salinity (ppt)	Seedling establishment number
			No. 1	No. 2	No. 3
		0	5	5	5
		1	14	14	15
		5	22	19	18
		15	50	41	45
